# Supplementary material for: Novel Dihydrocoumarins Induced by Radiolysis as Potent Tyrosinase Inhibitors
Source: MDPI journal article supplement (doi:10.3390/molecules29020341), 2024-01-10
Supplement: s1 [file s1]

## Supplementary Materials

# Novel Dihydrocoumarins Induced by Radiolysis as Potent Tyrosinase Inhibitors

Gyeong Han Jeong <sup>1,2</sup>, Manisha Yadav <sup>3</sup>, Seung Sik Lee <sup>1,4</sup>, Byung Yeoup Chung <sup>1</sup>, Jae-Hyeon Cho <sup>5</sup>, In-Chul Lee <sup>6</sup>, Hyoungh-Woo Bai <sup>1,2,4,\*</sup>, and Tae Hoon Kim <sup>3,\*</sup>

<sup>1</sup> Research division for Biotechnology, Advanced Radiation Technology Institute (ARTI), Korea Atomic Energy Research Institute (KAERI), Jeongeup 56212, Republic of Korea; jkh4598@hanmail.net (G.H.J.); sslee@kaeri.re.kr (S.S.L.); bychung@kaeri.re.kr (B.Y.C.).

<sup>2</sup> Center for companion animal new drug development, Korea Institute of Toxicology (KIT), Jeongeup 56212, Republic of Korea

<sup>3</sup> Department of Food Science and Biotechnology, Daegu University, Gyeongsan 38453, Republic of Korea; manishayv41@gmail.com (M.Y.)

<sup>4</sup> Radiation Biotechnology and Applied Radioisotope Science, University of Science and Technology (UST), Daejeon 34113, Republic of Korea

<sup>5</sup> Institute of Animal Medicine, College of Veterinary Medicine, Gyeongsang National University, Jinju 52828, Republic of Korea; jaehcho@gun.ac.kr (J.H.C.)

<sup>6</sup> Department of Cosmetic Science and Technology, Seowon University, Cheongju 28674, Republic of Korea lic9418@seowon.ac.kr (I.C.L.)

\* Correspondence: hbai@kaeri.re.kr (H.W.B.); skyey7@daege.ac.kr (T.H.K.)

## Contents

**Figure S1.**  $^1\text{H}$  NMR spectrum of compound **1** in  $\text{CD}_3\text{OD}$ .

**Figure S2.**  $^{13}\text{C}$  NMR spectrum of compound **1** in  $\text{CD}_3\text{OD}$ .

**Figure S3.** HSQC spectrum of compound **1** in  $\text{CD}_3\text{OD}$ .

**Figure S4.** HMBC spectrum of compound **1** in  $\text{CD}_3\text{OD}$ .

**Figure S5.** NOESY spectrum of compound **1** in  $\text{CD}_3\text{OD}$ .

**Figure S6.** HRESIMS spectrum of compound **1**.

**Figure S7.**  $^1\text{H}$  NMR spectrum of compound **2** in  $\text{CD}_3\text{OD}$ .

**Figure S8.**  $^{13}\text{C}$  NMR spectrum of compound **2** in  $\text{CD}_3\text{OD}$ .

**Figure S9.** HSQC spectrum of compound **2** in  $\text{CD}_3\text{OD}$ .

**Figure S10.** HMBC spectrum of compound **2** in  $\text{CD}_3\text{OD}$ .

**Figure S11.** NOESY spectrum of compound **2** in  $\text{CD}_3\text{OD}$ .

**Figure S12.** HRESIMS spectrum of compound **2**.

**Figure S13.**  $^1\text{H}$  NMR spectrum of compound **3** in  $\text{CD}_3\text{OD}$ .

**Figure S14.**  $^{13}\text{C}$  NMR spectrum of compound **3** in  $\text{CD}_3\text{OD}$ .

**Figure S15.** HSQC spectrum of compound **3** in  $\text{CD}_3\text{OD}$ .

**Figure S16.** HMBC spectrum of compound **3** in  $\text{CD}_3\text{OD}$ .

**Figure S17.** NOESY spectrum of compound **3** in  $\text{CD}_3\text{OD}$ .

**Figure S18.** HRESIMS spectrum of compound **3**.

**Figure S19.**  $^1\text{H}$  NMR spectrum of compound **4** in acetone- $d_6$ + $\text{D}_2\text{O}$ .

**Figure S20.**  $^{13}\text{C}$  NMR spectrum of compound **4** in acetone- $d_6$ + $\text{D}_2\text{O}$ .

**Figure S21.** HSQC spectrum of compound **4** in acetone- $d_6$ + $\text{D}_2\text{O}$ .

**Figure S22.** HMBC spectrum of compound **4** in acetone- $d_6$ +D<sub>2</sub>O.

**Figure S23.** NOESY spectrum of compound **4** in acetone- $d_6$ +D<sub>2</sub>O.

**Figure S24.** HRESIMS spectrum of compound **4**.

**Figure S25.** HPLC chromatograms of gamma-ray treated reactant and newly generated compounds **1–4**.

**Figure S26.** Effects of isolated compounds on the cell viability in B16F10 cells. Cell viability detection by MTT assay in B16F10 cells after treatment with extracts for 24 h.

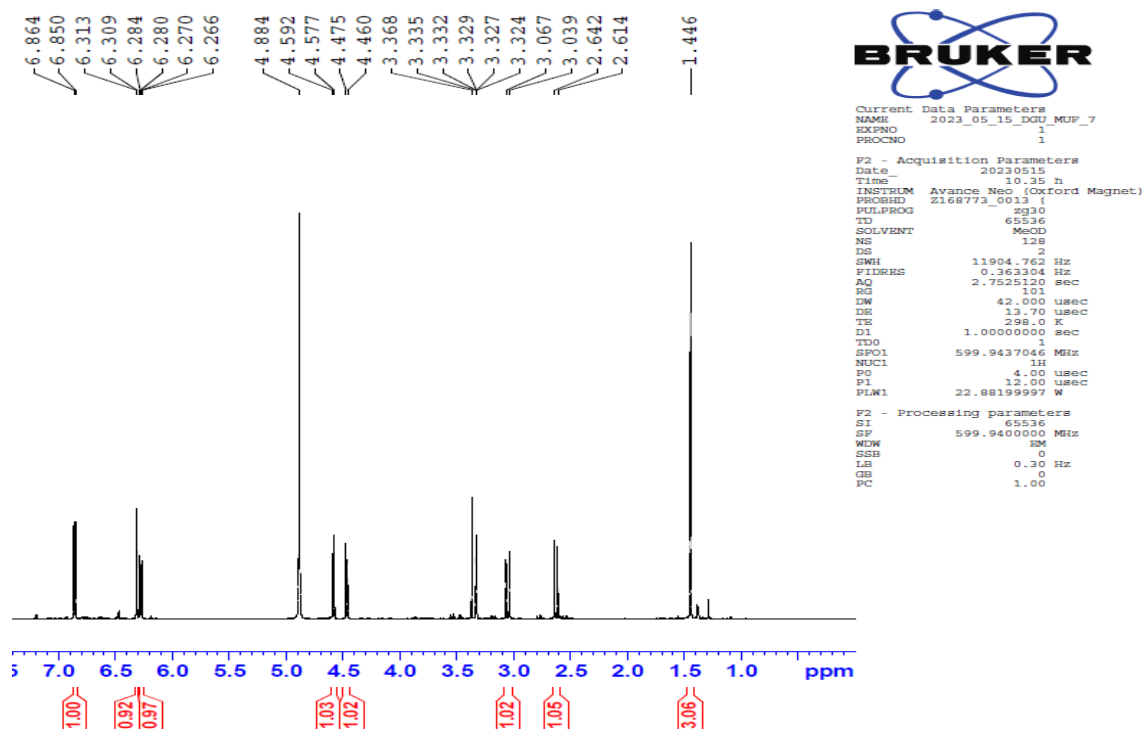

Figure S1.  $^1\text{H}$  NMR spectrum of compound **1** in  $\text{CD}_3\text{OD}$ .

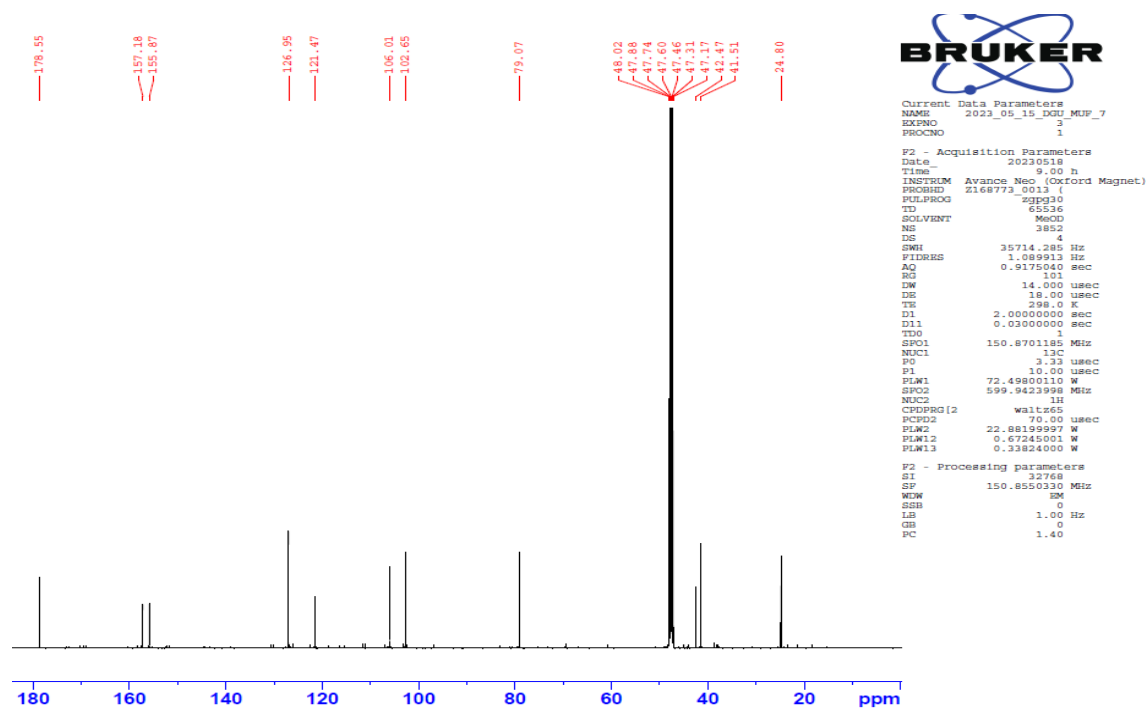

Figure S2.  $^{13}\text{C}$  NMR spectrum of compound **1** in  $\text{CD}_3\text{OD}$ .



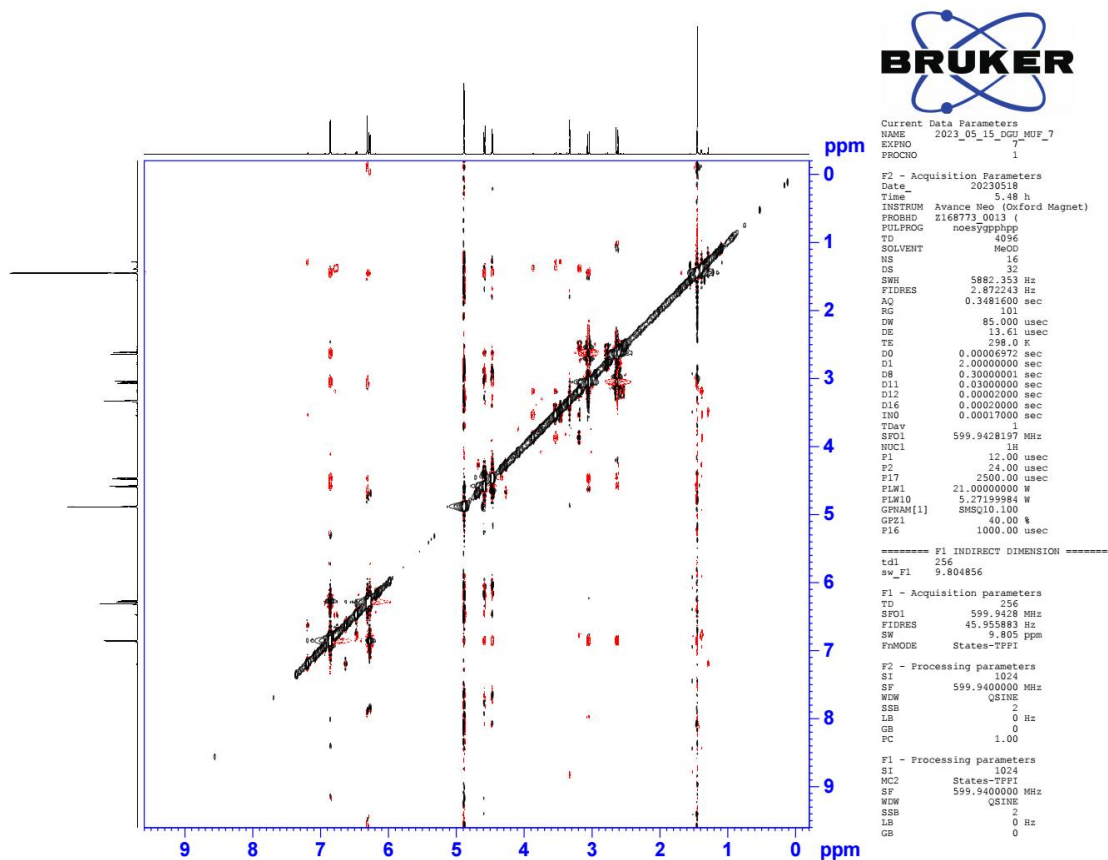

Figure S5. NOESY spectrum of compound 1 in CD<sub>3</sub>OD.

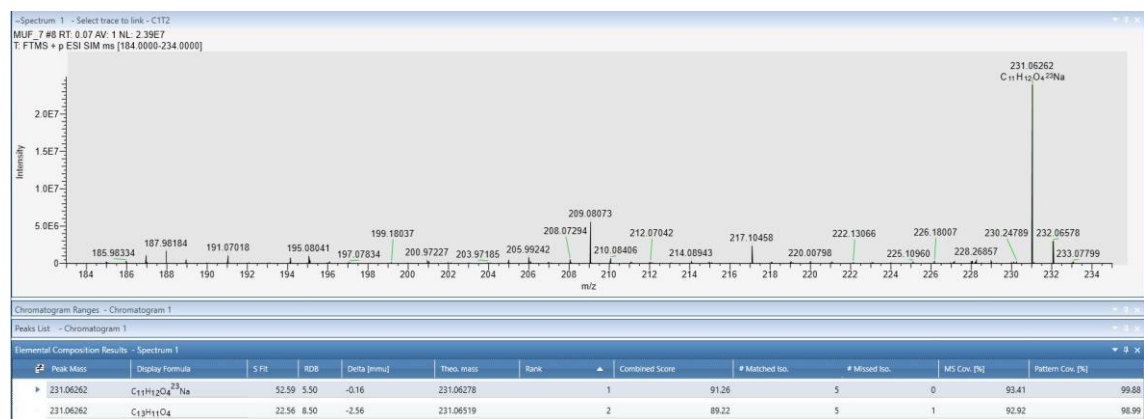

Figure S6. HRESIMS spectrum of compound 1.

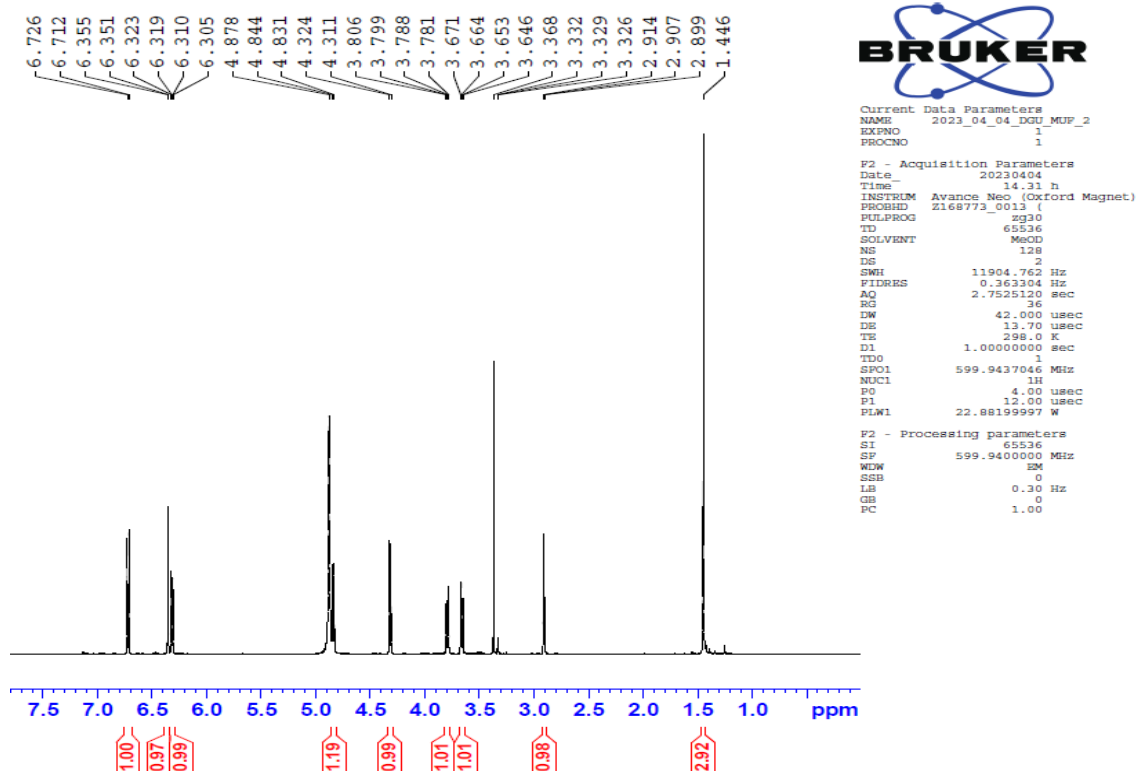

Figure S7.  $^1\text{H}$  NMR spectrum of compound **2** in  $\text{CD}_3\text{OD}$ .

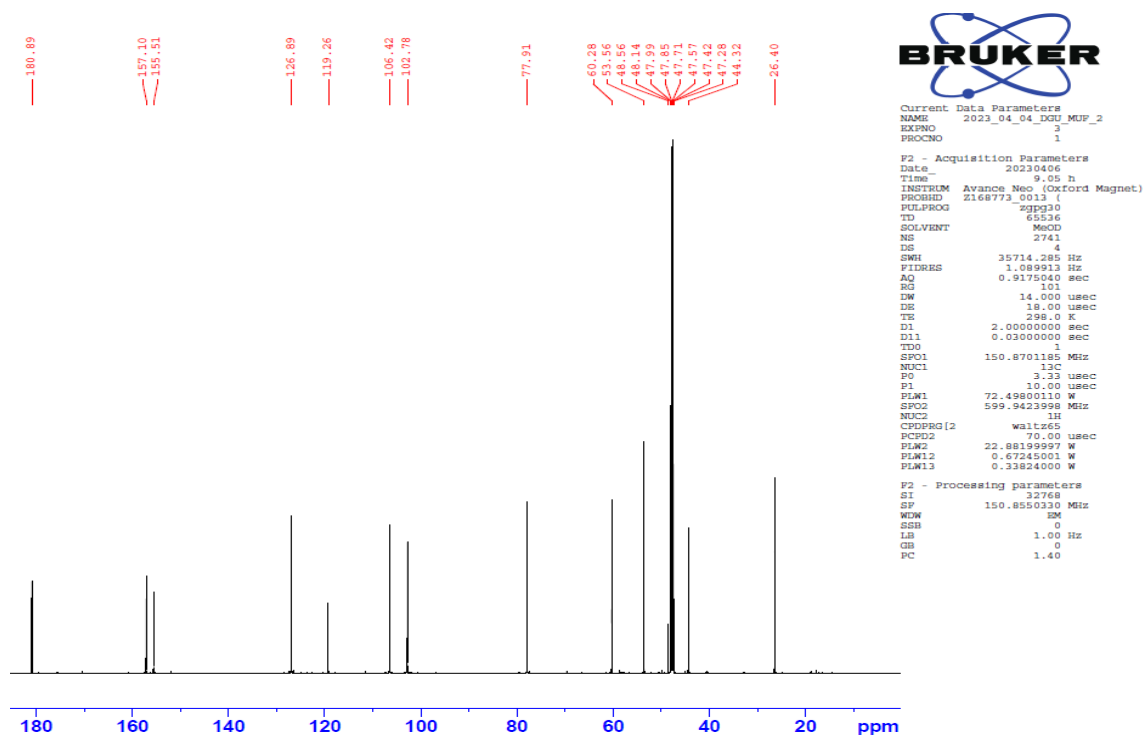

Figure S8.  $^{13}\text{C}$  NMR spectrum of compound **2** in  $\text{CD}_3\text{OD}$ .





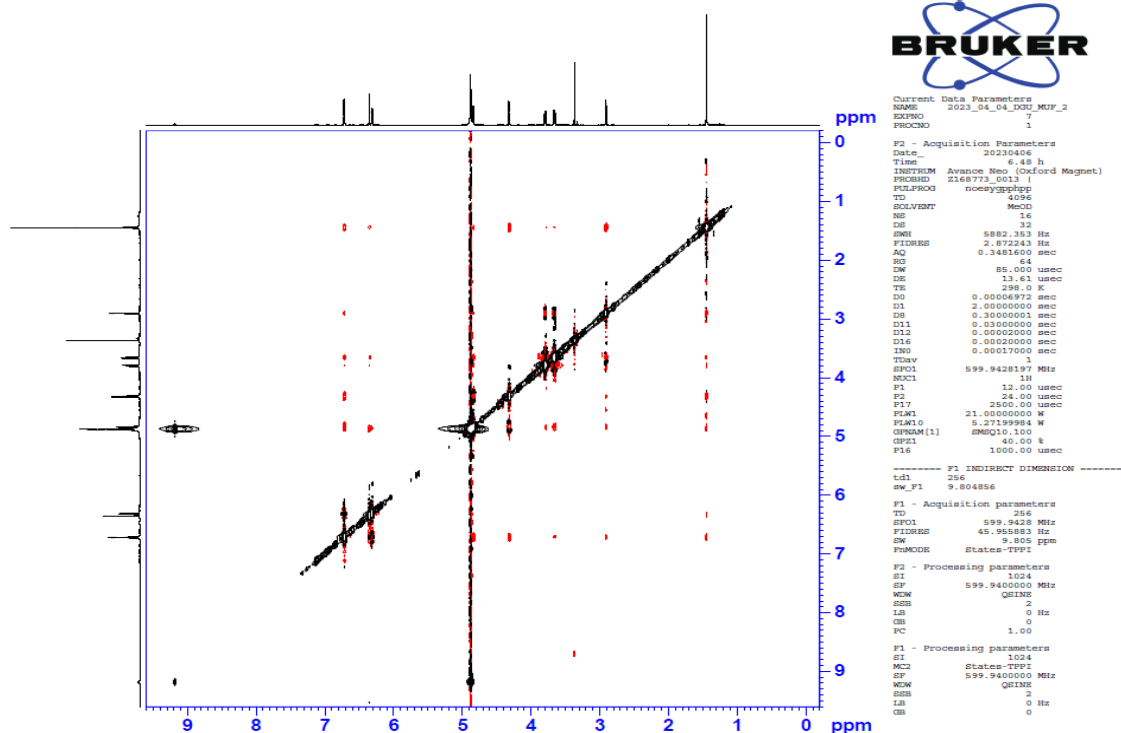

**Figure S11.** NOESY spectrum of compound **2** in CD<sub>3</sub>OD.

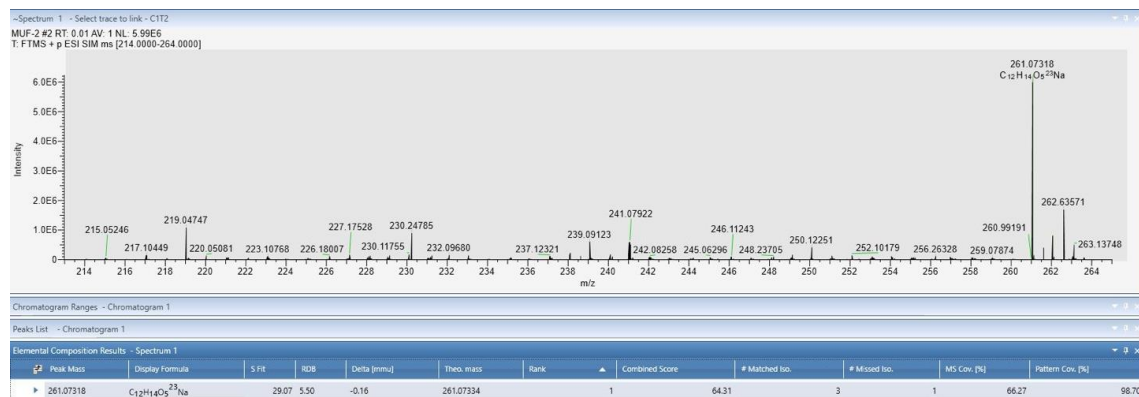

**Figure S12.** HRESIMS spectrum of compound **2**.

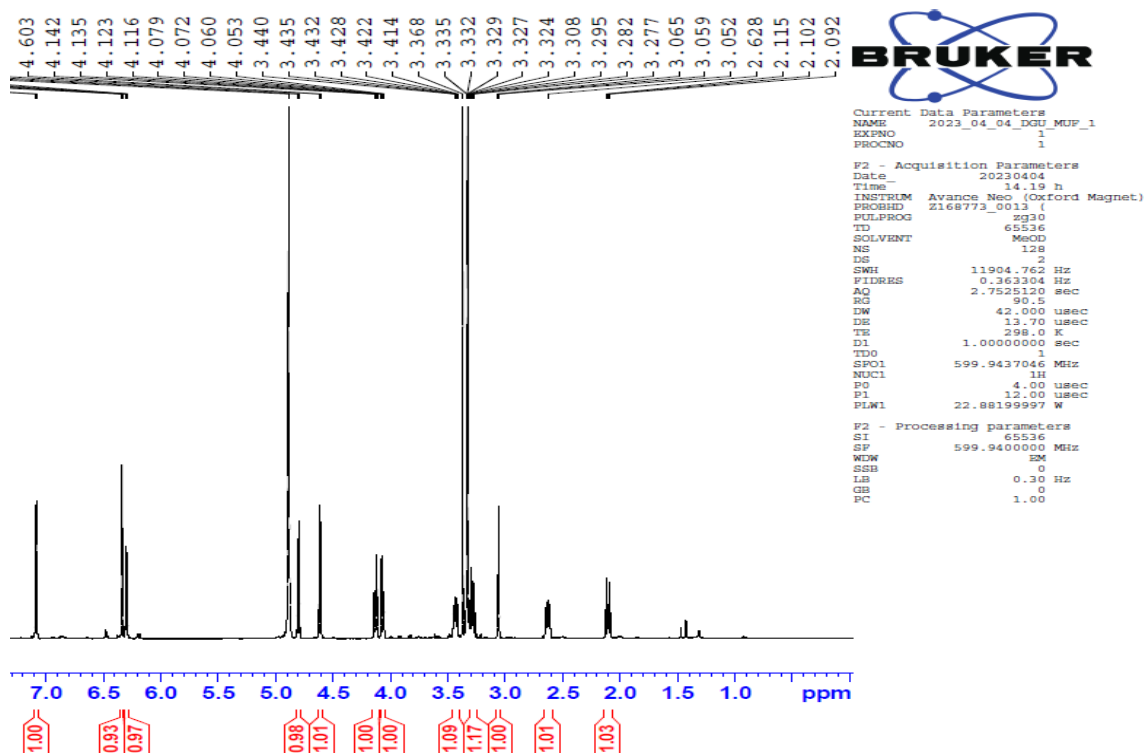

Figure S13.  $^1\text{H}$  NMR spectrum of compound **3** in  $\text{CD}_3\text{OD}$ .

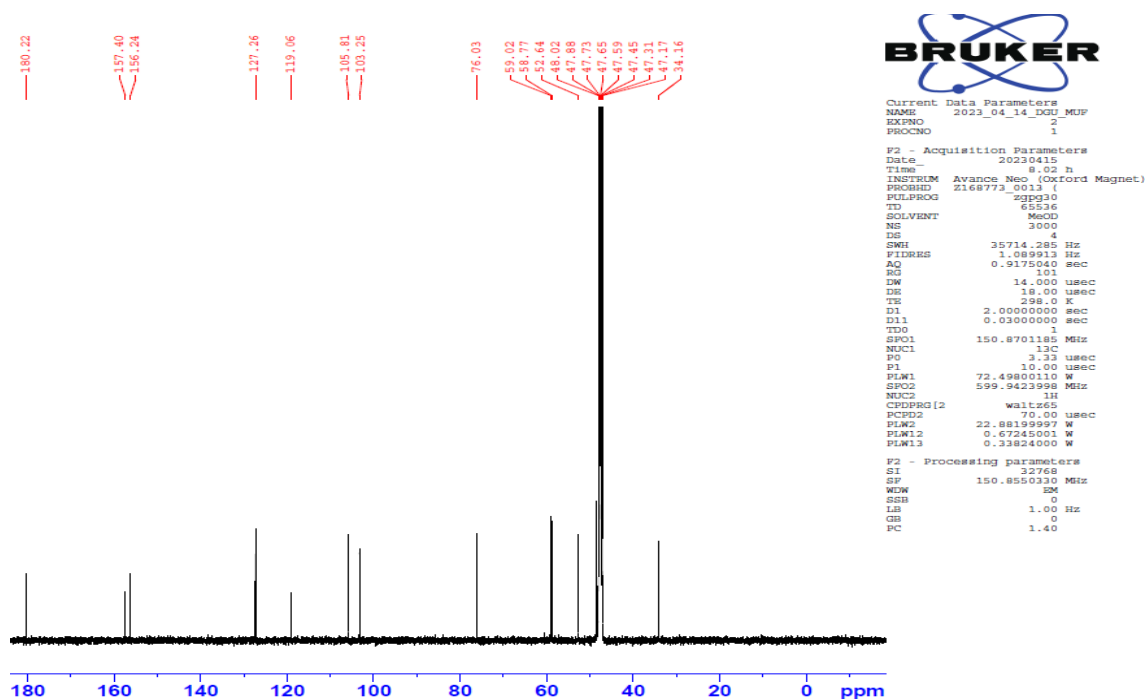

Figure S14.  $^{13}\text{C}$  NMR spectrum of compound **3** in  $\text{CD}_3\text{OD}$ .



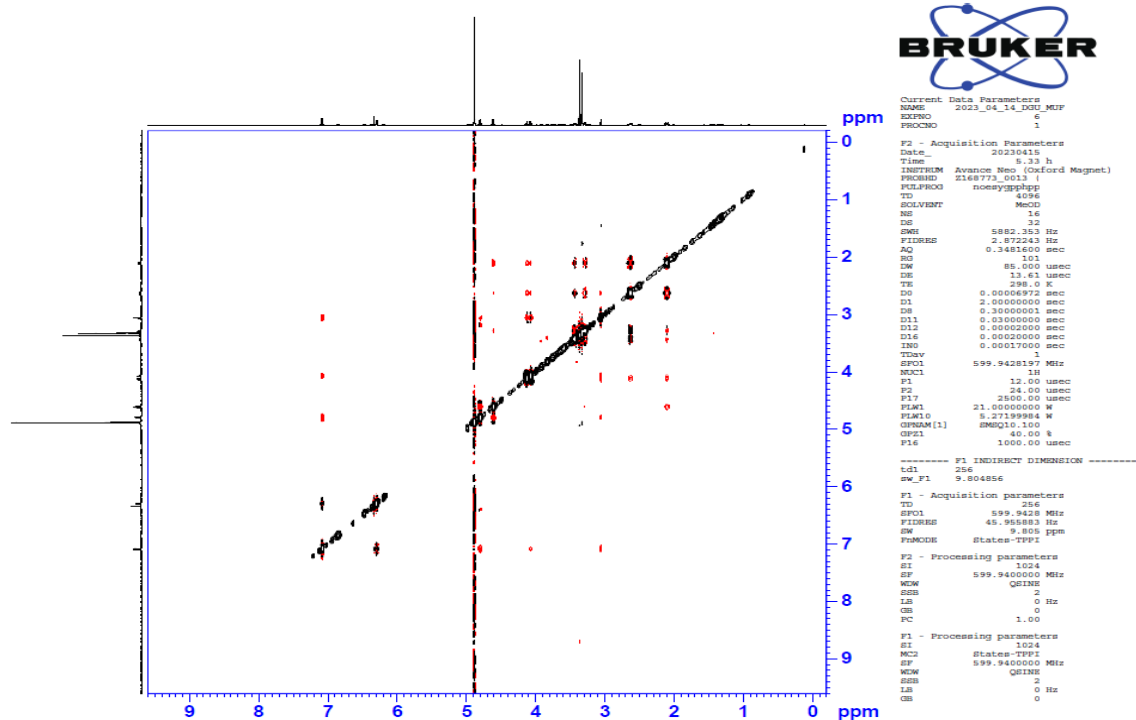

**Figure S17.** NOESY spectrum of compound **3** in CD<sub>3</sub>OD.

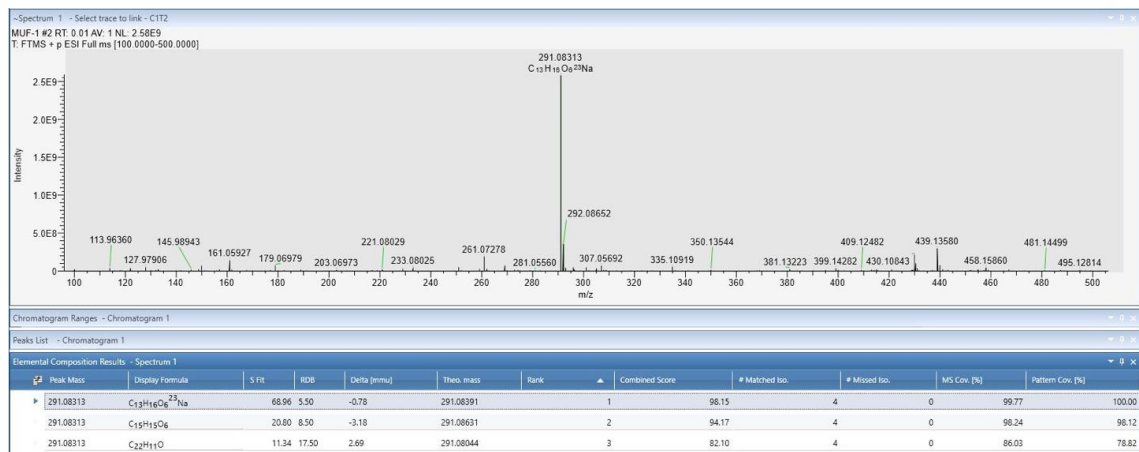

**Figure S18.** HRESIMS spectrum of compound **3**.

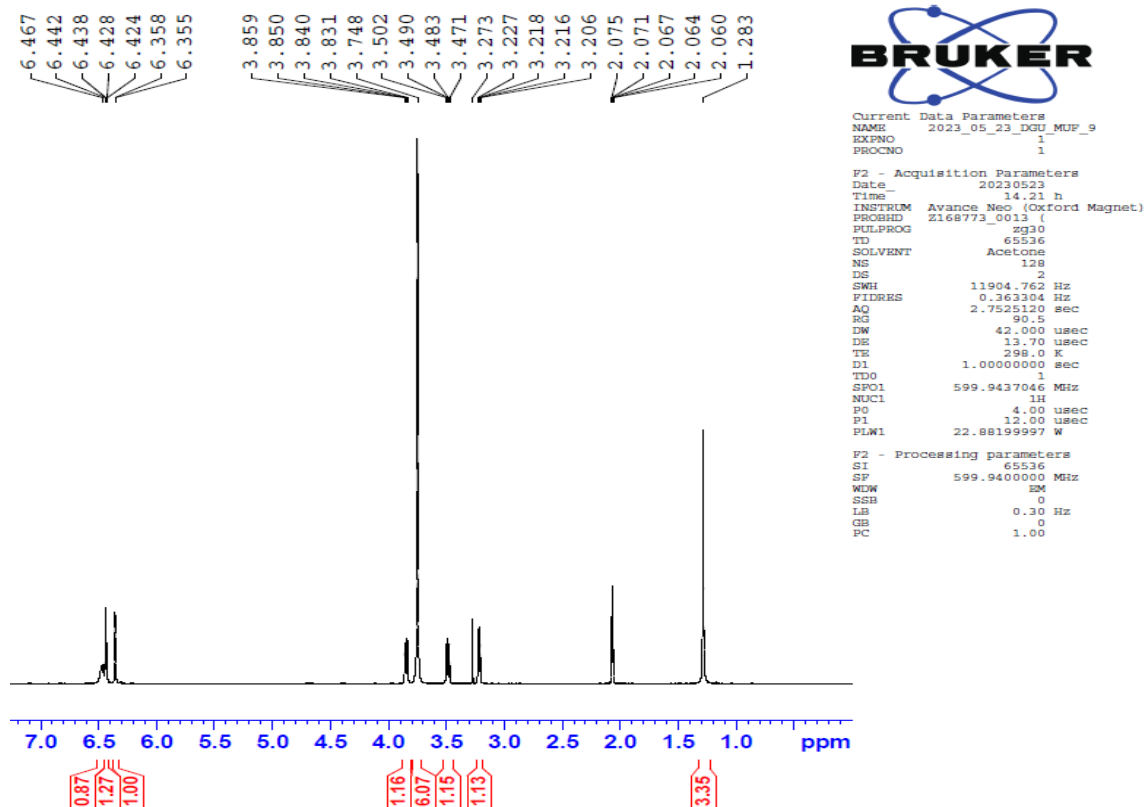

Figure S19.  $^1\text{H}$  NMR spectrum of compound **4** in acetone- $d_6$ + $\text{D}_2\text{O}$ .

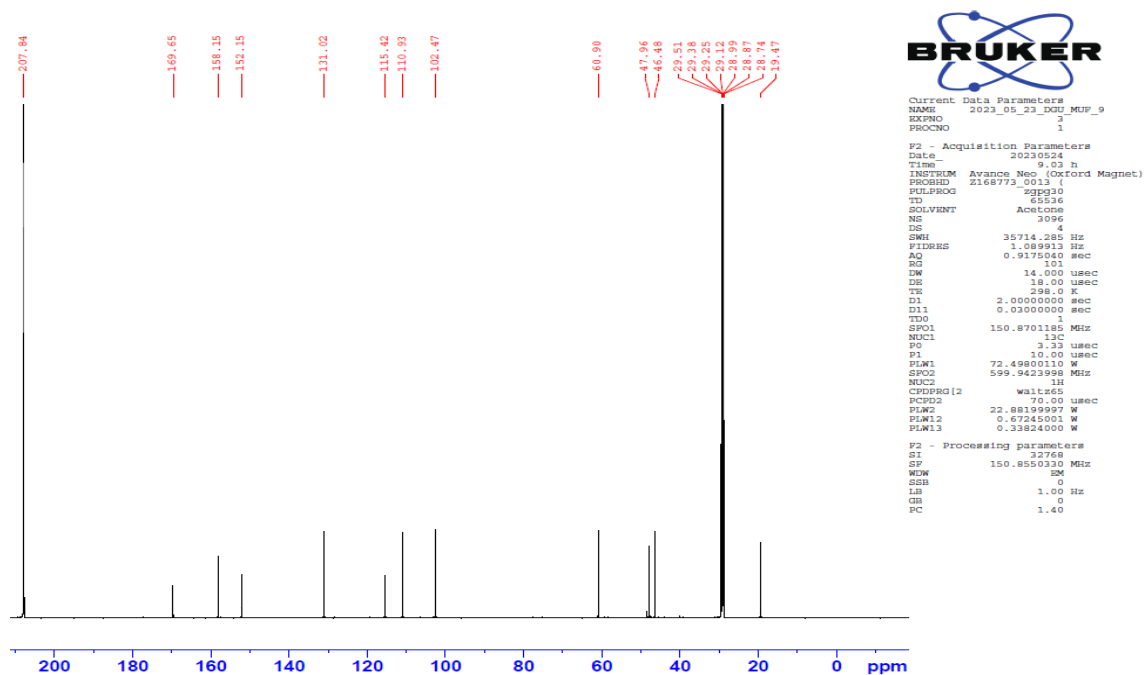

Figure S20.  $^{13}\text{C}$  NMR spectrum of compound **4** in acetone- $d_6$ + $\text{D}_2\text{O}$ .



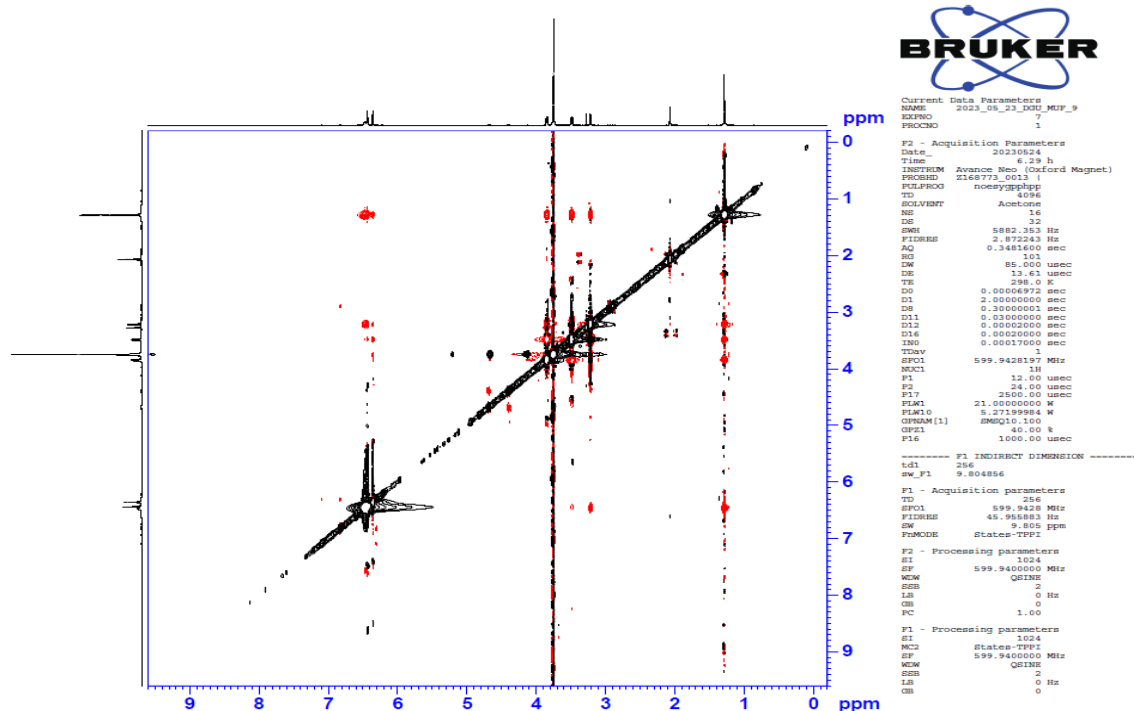

**Figure S23.** NOESY spectrum of compound **4** in acetone- $d_6$ /D $_2$ O.

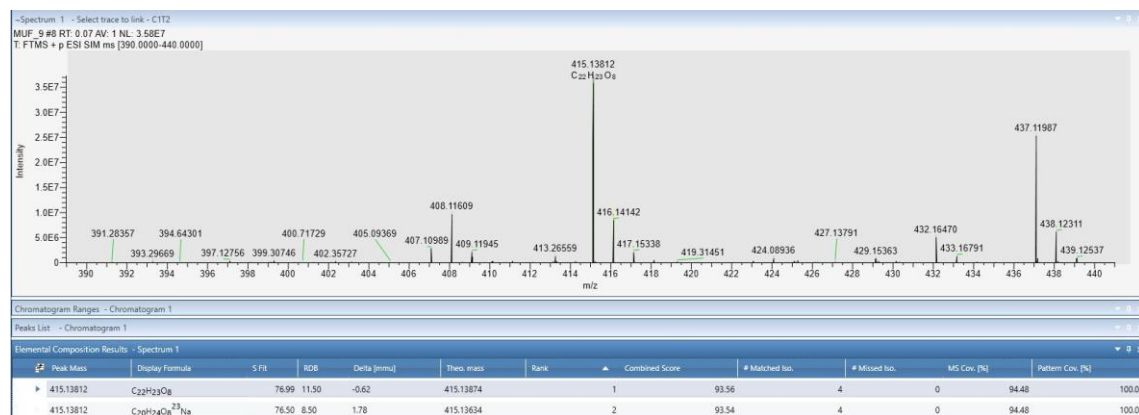

**Figure S24.** HRESIMS spectrum of compound **4**.

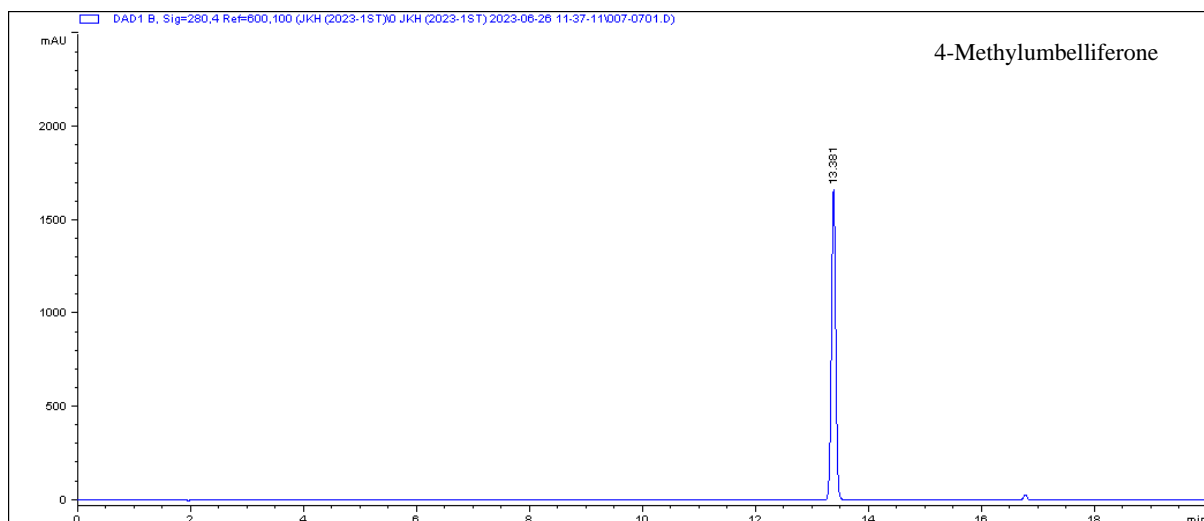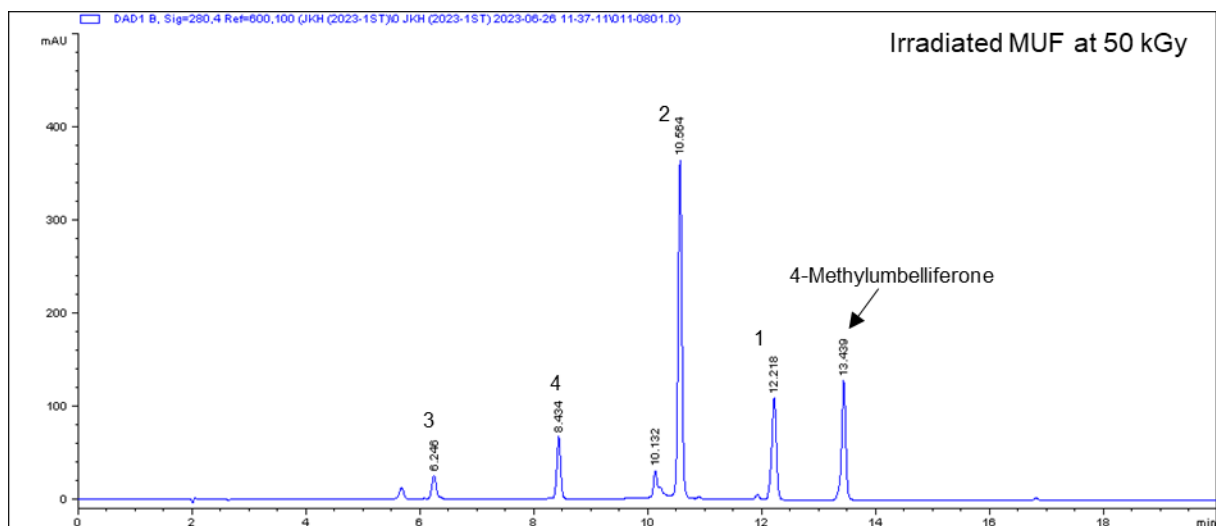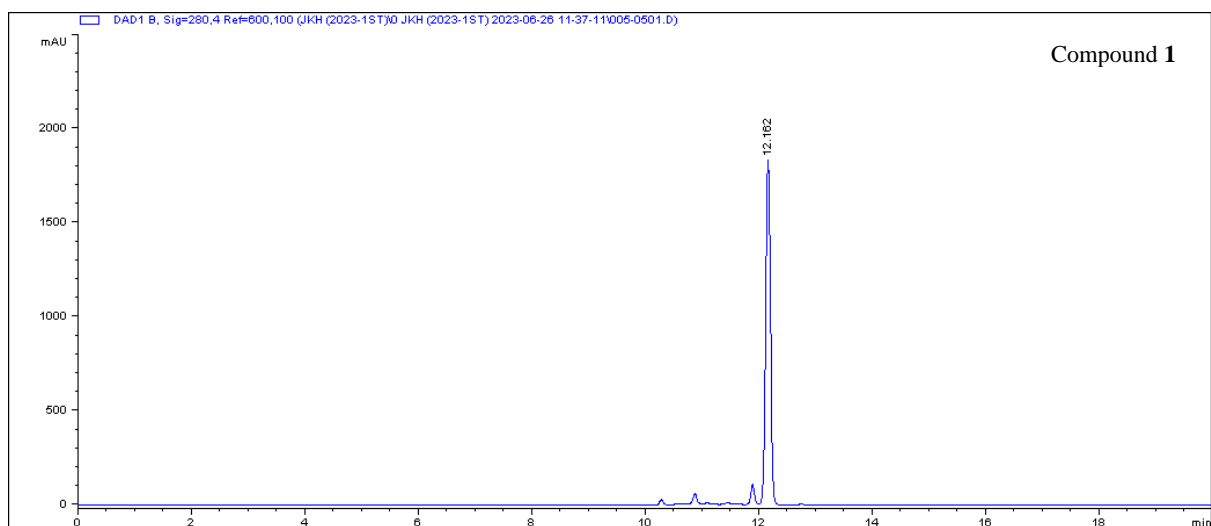



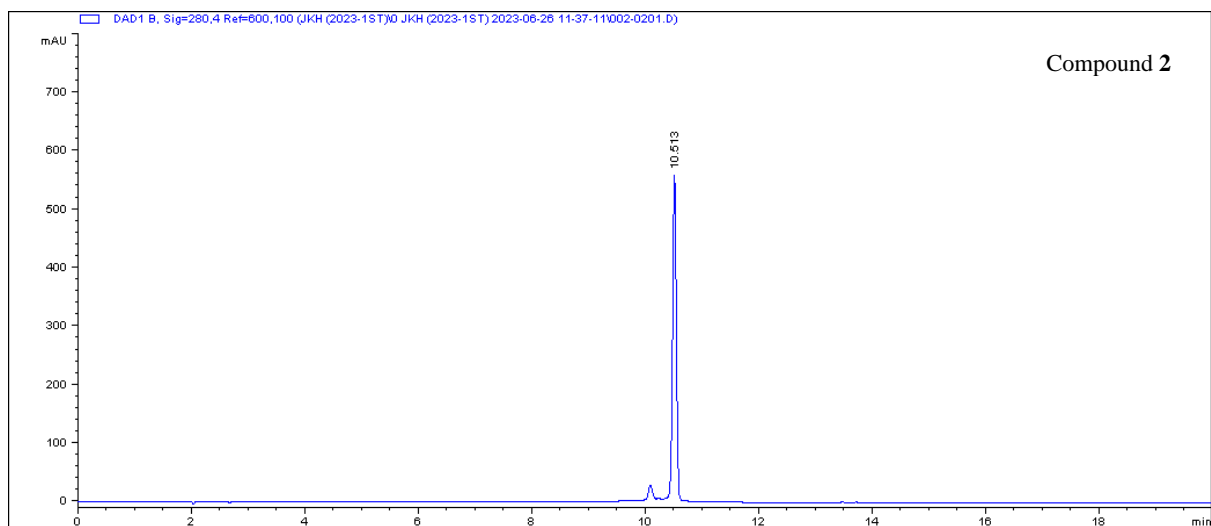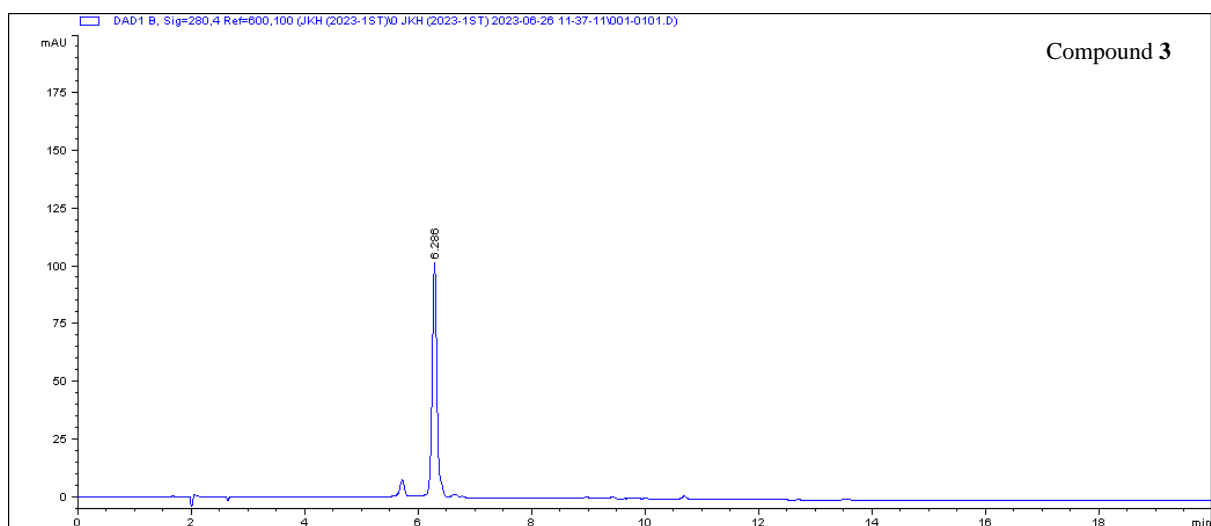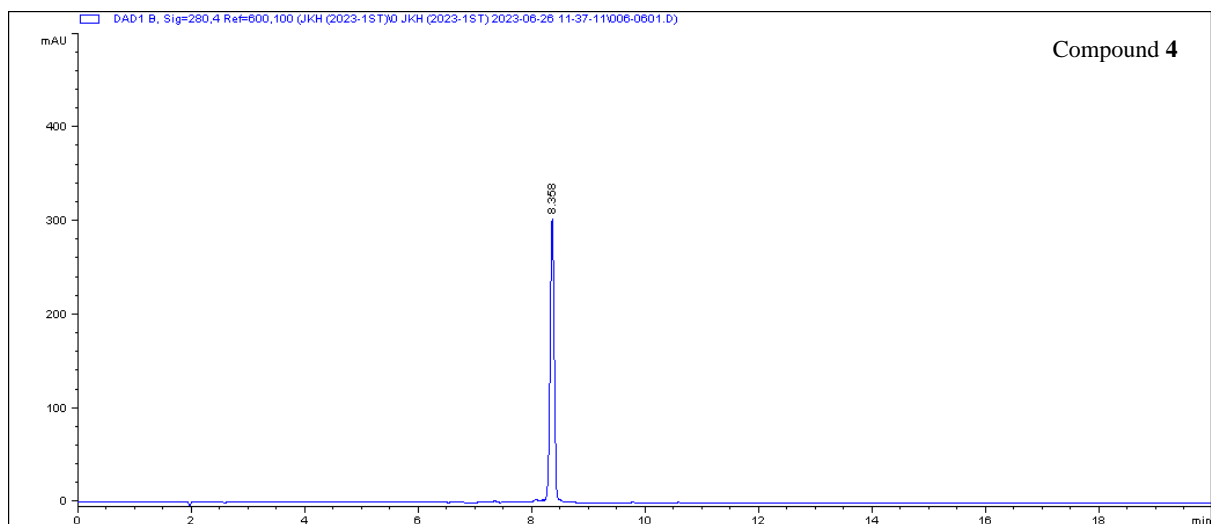

HPLC analysis was conducted on a YMC-Pack ODS A-302 column (4.6 mm i.d. × 150 mm; 5 μm particle size; YMC Co., Kyoto, Japan), and the gradient solvent system (detection: UV 280 nm; temperature: 40 °C) initiated with 0.1% HCOOH, increased to CH<sub>3</sub>CN over 20 min and the flow rate was set at 1.0 mL/min.

**Figure S25.** HPLC chromatograms of gamma ray treated reactant and newly generated molecules **1–4**.

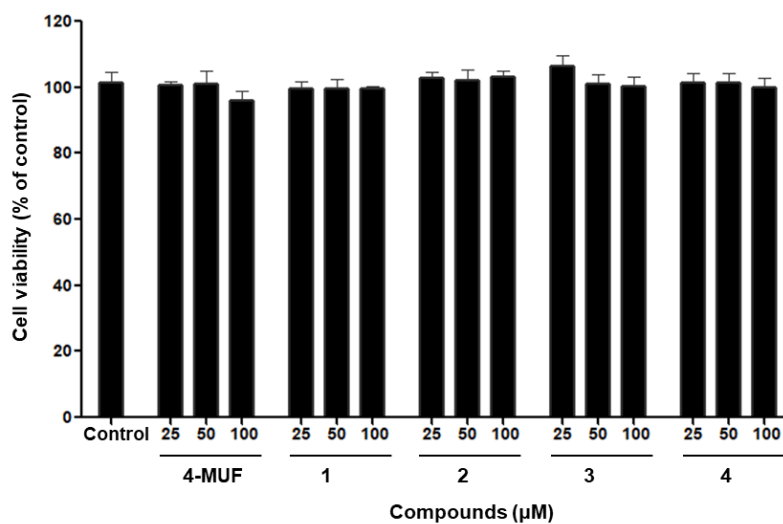

**Figure S26.** Effects of isolated compounds on the cell viability in B16F10 cells. Cell viability detection by MTT assay in B16F10 cells after treatment with extracts for 24 h.
